# Supplementary material
Source: MDPI journal article supplement (https://www.mdpi.com/2304-6740/8/9/47)

# Supplementary Materials: Reactivity of Coordinated 2-Pyridyl Oximes: Synthesis, Structure, Spectroscopic Characterization and Theoretical Studies of Dichlorodi{(2-pyridyl)furoxan}zinc(II) Obtained from the Reaction Between Zinc(II) Nitrate and Pyridine-2-Chloroxime

Sokratis T. Tsantis, Vlasoula Bekiari, Demetrios I. Tzimopoulos, Catherine P. Raptopoulou, Vassilis Psycharis, Athanasios Tsepis and Spyros P. Perlepes

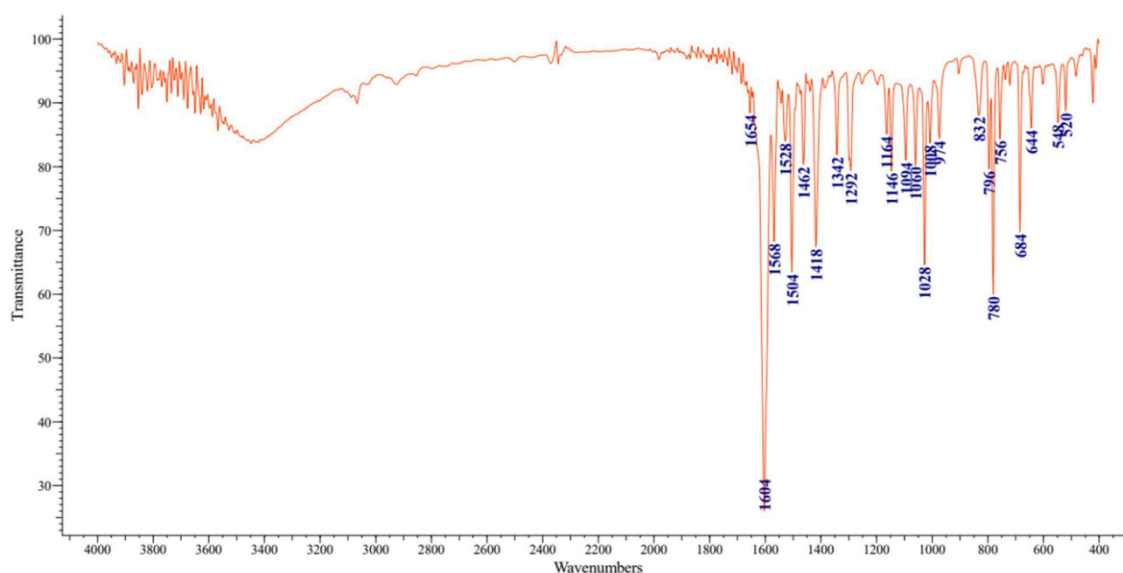

**Figure S1.** The IR spectrum (KBr, cm<sup>-1</sup>) of complex [ZnCl<sub>2</sub>(L)] (1).

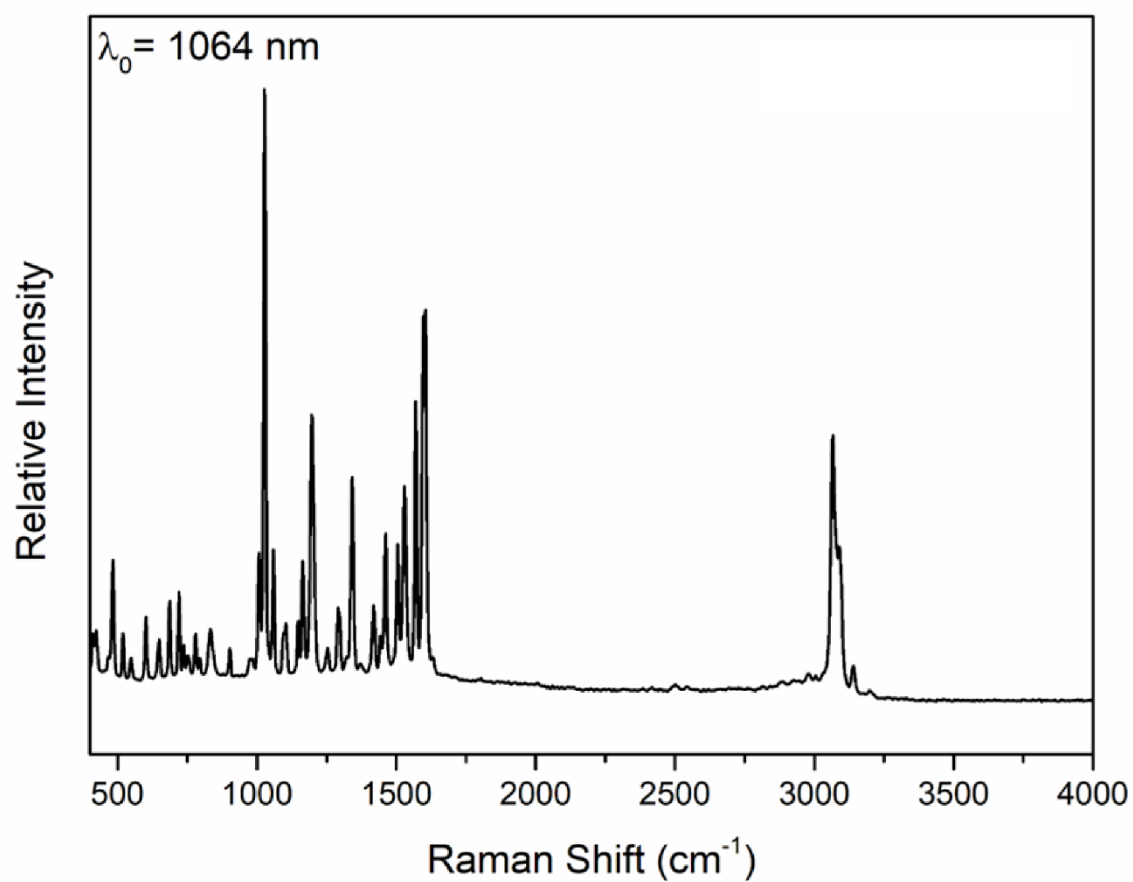

**Figure S2.** The FT-Raman spectrum of complex  $[ZnCl_2(L)]$  (1).

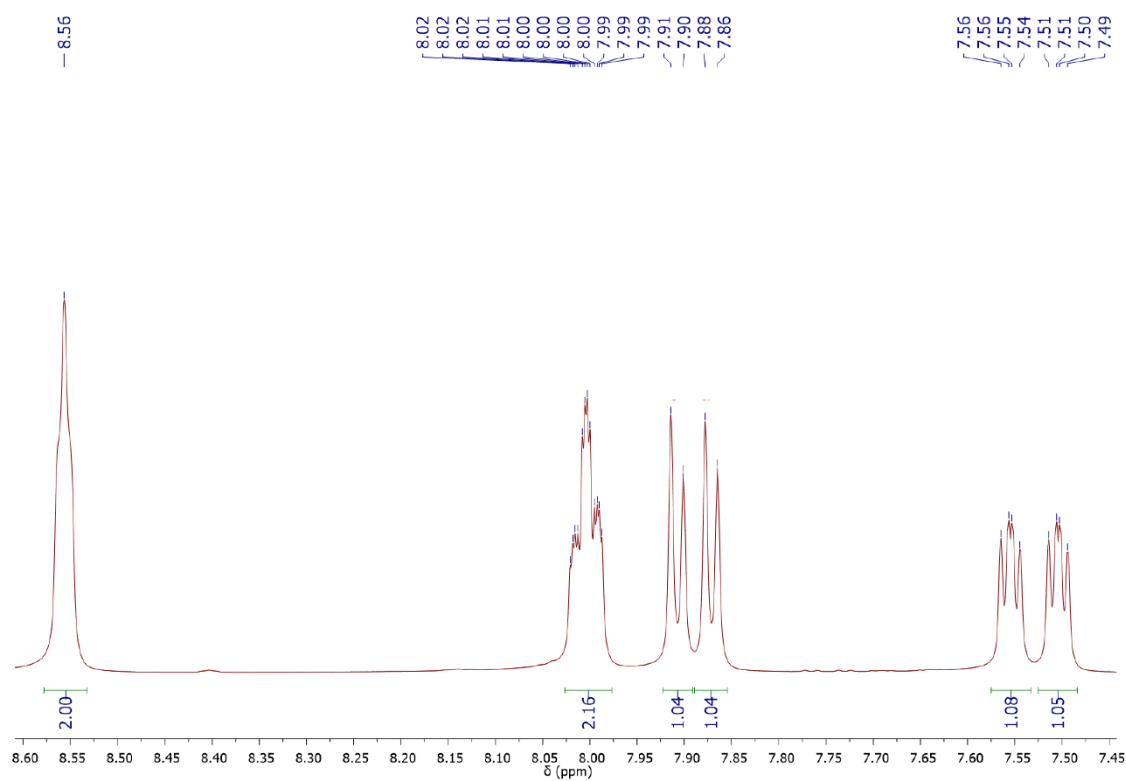

**Figure S3.** The  $^1\text{H}$  NMR spectrum ( $\delta$ , ppm) of complex  $[\text{ZnCl}_2(\text{L})]$  (1) in  $d_6$ -DMSO in the aromatic region.

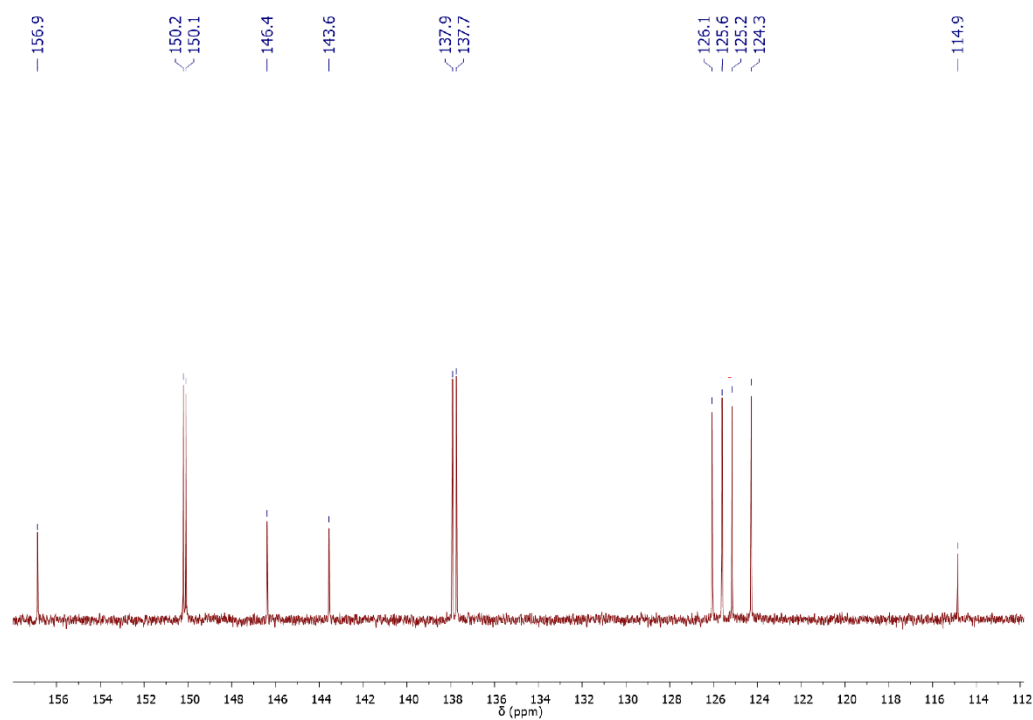

**Figure S4.** The  $^{13}\text{C}$  NMR spectrum ( $d_6$ -DMSO,  $\delta$ /ppm) of complex  $[\text{ZnCl}_2(\text{L})]$  (1) in the  $\delta$  range 160–112 ppm.

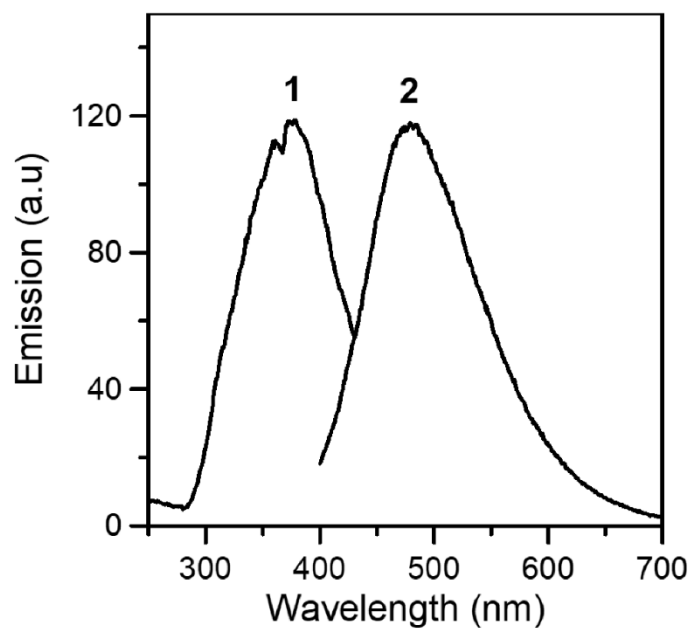

**Figure S5.** Solution (MeOH), room-temperature excitation (curve 1; maximum emission at 479 nm) and emission (curve 2; maximum excitation at 373 nm) spectra of the free ligand L.

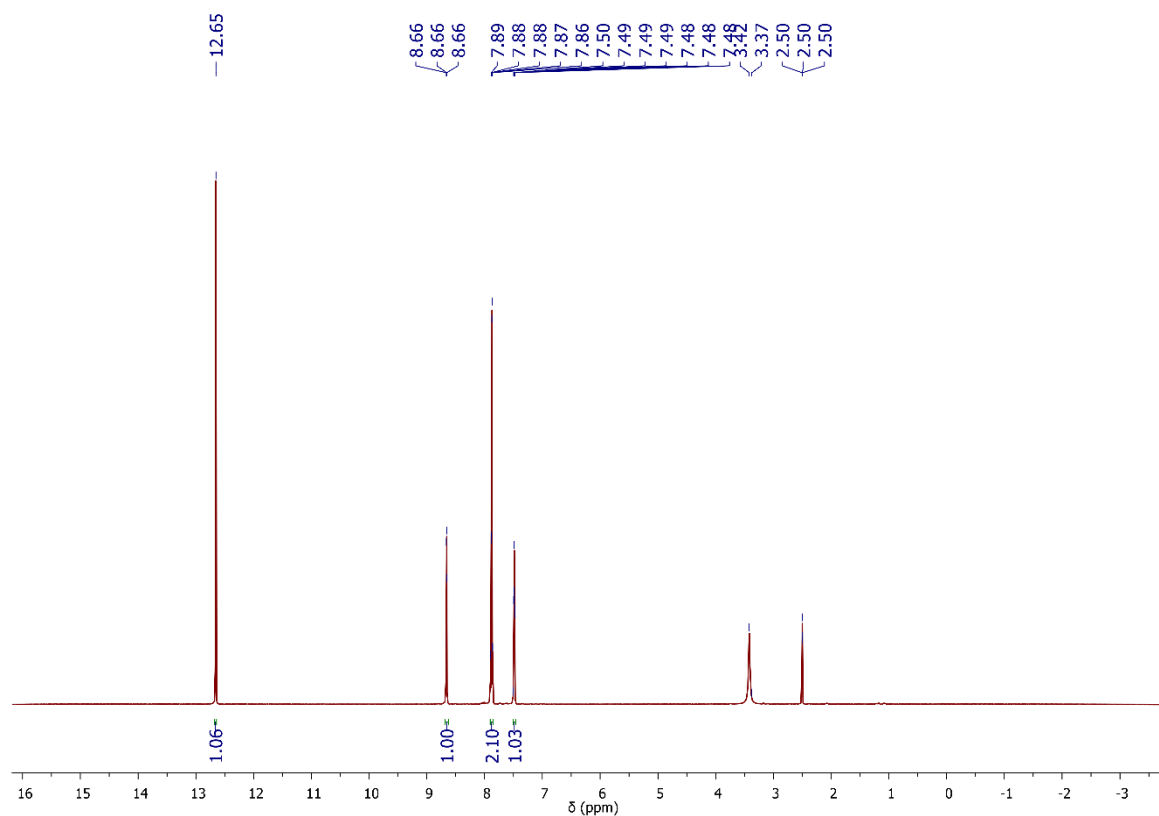

**Figure S6.** The  $^1\text{H}$  NMR spectrum ( $d_6$ -DMSO,  $\delta/\text{ppm}$ ) of ClpaoH.

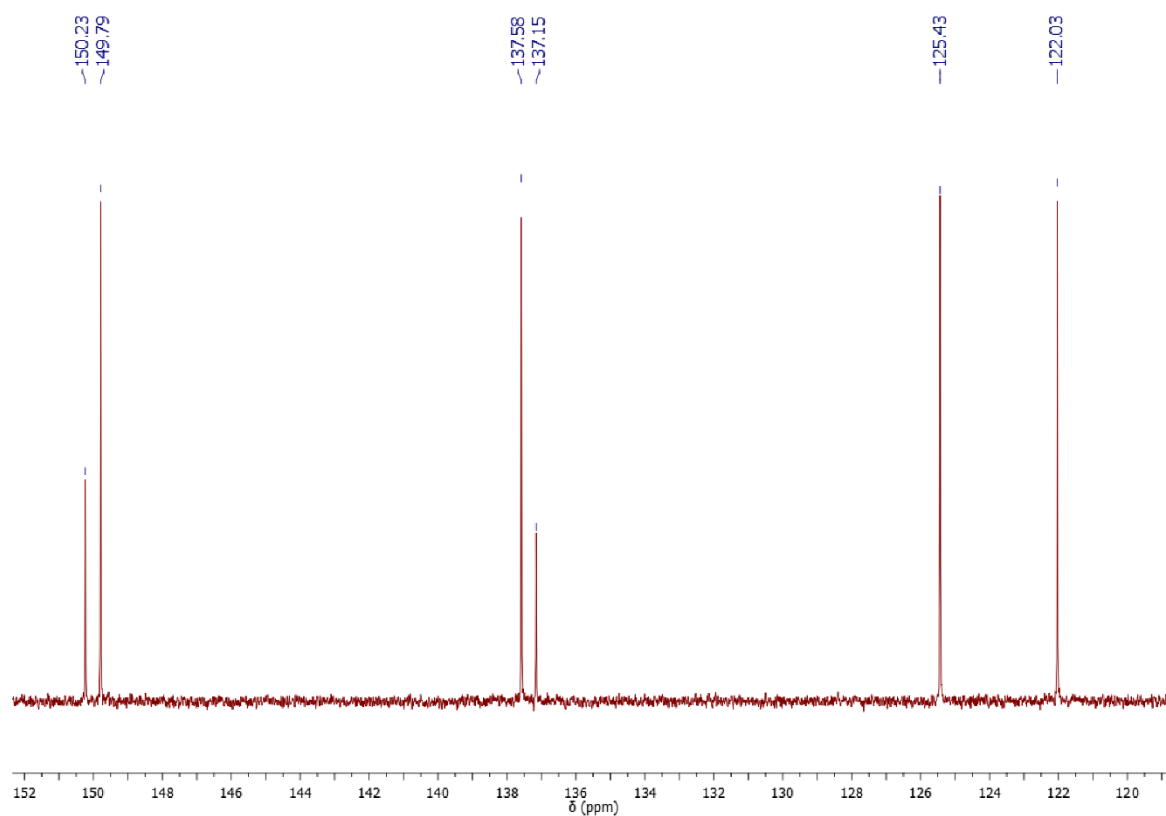

**Figure S7.** The  $^{13}\text{C}$  NMR spectrum ( $d_6$ -DMSO,  $\delta/\text{ppm}$ ) of ClpaoH in the  $\delta$  range 153–120 ppm.

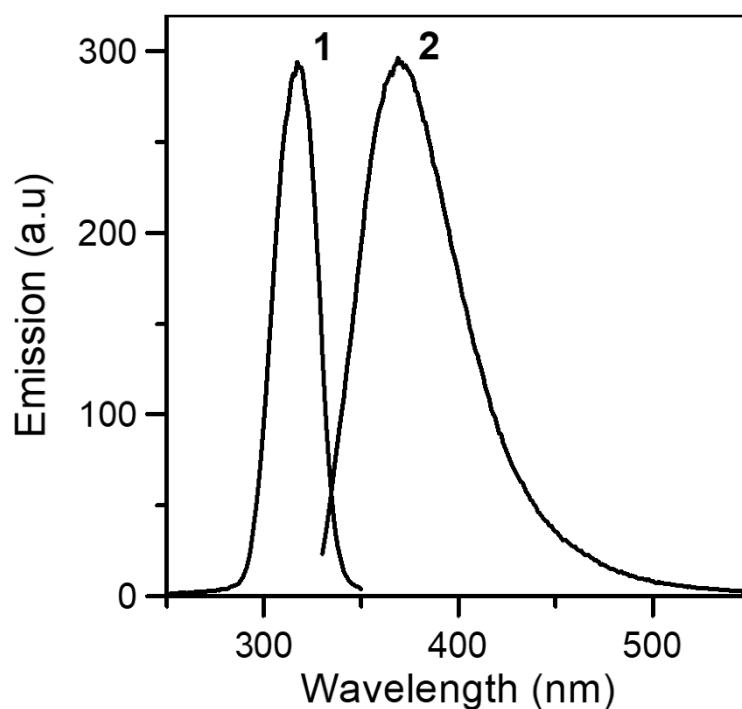

**Figure S8.** Solution (MeOH), room-temperature excitation (curve 1; maximum emission at 369 nm) and emission (curve 2; maximum excitation at 317 nm) spectra of ClpaoH.

**Table S1.** Cartesian coordinates and selected energetic data for the species participating in the reaction of ClpaoH and  $\text{Zn}(\text{NO}_3)_2 \cdot 6\text{H}_2\text{O}$  in the presence of  $\text{Et}_3\text{N}$ .

| <b>ClpaoH</b>                                |              |              |              |
|----------------------------------------------|--------------|--------------|--------------|
| C                                            | −3.193893000 | −0.083400000 | 0.001560000  |
| C                                            | −2.523944000 | 1.116233000  | 0.205751000  |
| C                                            | −1.131619000 | 1.120041000  | 0.208439000  |
| C                                            | −0.462164000 | −0.089079000 | 0.005982000  |
| N                                            | −1.100426000 | −1.250460000 | −0.195621000 |
| C                                            | −2.431176000 | −1.235926000 | −0.192921000 |
| C                                            | 1.018862000  | −0.160657000 | 0.021150000  |
| Cl                                           | 1.905956000  | 1.336817000  | −0.198642000 |
| N                                            | 1.624460000  | −1.268776000 | 0.190844000  |
| O                                            | 2.974494000  | −1.305900000 | 0.188557000  |
| H                                            | −4.278184000 | −0.133943000 | −0.011780000 |
| H                                            | −3.071063000 | 2.041228000  | 0.363634000  |
| H                                            | −0.585432000 | 2.042280000  | 0.371941000  |
| H                                            | −2.917060000 | −2.194911000 | −0.362040000 |
| H                                            | 3.329913000  | −0.401976000 | 0.040380000  |
| Sum of electronic and zero-point Energies=   |              |              | −875.783196  |
| Sum of electronic and thermal Energies=      |              |              | −875.774808  |
| Sum of electronic and thermal Enthalpies=    |              |              | −875.773864  |
| Sum of electronic and thermal Free Energies= |              |              | −875.818005  |
| <b>Clpao<sup>−</sup></b>                     |              |              |              |
| C                                            | −3.170918000 | −0.055680000 | 0.007133000  |
| C                                            | −2.468168000 | 1.144976000  | 0.067173000  |
| C                                            | −1.079767000 | 1.123589000  | 0.062137000  |
| C                                            | −0.406609000 | −0.112020000 | −0.003208000 |
| N                                            | −1.091433000 | −1.274359000 | −0.069304000 |
| C                                            | −2.422084000 | −1.229232000 | −0.059745000 |
| C                                            | 1.055685000  | −0.195601000 | 0.002240000  |
| Cl                                           | 1.962386000  | 1.349759000  | −0.061405000 |
| N                                            | 1.708639000  | −1.310538000 | 0.059512000  |
| O                                            | 2.995739000  | −1.346343000 | 0.065972000  |
| H                                            | −4.256214000 | −0.087824000 | 0.009672000  |
| H                                            | −2.994188000 | 2.095096000  | 0.120289000  |
| H                                            | −0.520111000 | 2.050177000  | 0.112767000  |
| H                                            | −2.925243000 | −2.194521000 | −0.112448000 |
| Sum of electronic and zero-point Energies=   |              |              | −875.332305  |
| Sum of electronic and thermal Energies=      |              |              | −875.324020  |
| Sum of electronic and thermal Enthalpies=    |              |              | −875.323076  |
| Sum of electronic and thermal Free Energies= |              |              | −875.367005  |

| <b>pao</b>                                   |              |              |              |
|----------------------------------------------|--------------|--------------|--------------|
| C                                            | 2.709662000  | −0.059394000 | 0.000532000  |
| C                                            | 2.070907000  | 1.176280000  | 0.000257000  |
| C                                            | 0.680598000  | 1.213479000  | −0.000470000 |
| C                                            | −0.007973000 | −0.004478000 | −0.000868000 |
| N                                            | 0.593717000  | −1.204939000 | −0.000491000 |
| C                                            | 1.926004000  | −1.214335000 | 0.000196000  |
| C                                            | −1.441451000 | −0.011448000 | −0.000338000 |
| N                                            | −2.601853000 | −0.008013000 | −0.000366000 |
| O                                            | −3.816859000 | −0.003805000 | 0.000938000  |
| H                                            | 3.792480000  | −0.135265000 | 0.001182000  |
| H                                            | 2.642575000  | 2.099728000  | 0.000874000  |
| H                                            | 0.137088000  | 2.152674000  | −0.000309000 |
| H                                            | 2.393195000  | −2.196664000 | 0.000893000  |
| Sum of electronic and zero-point Energies=   |              |              | −415.134097  |
| Sum of electronic and thermal Energies=      |              |              | −415.127062  |
| Sum of electronic and thermal Enthalpies=    |              |              | −415.126117  |
| Sum of electronic and thermal Free Energies= |              |              | −415.166443  |

| <b>[Zn(Cl pao)]<sup>+</sup></b>              |              |              |              |
|----------------------------------------------|--------------|--------------|--------------|
| C                                            | −3.250825000 | 0.400375000  | 0.043122000  |
| C                                            | −2.745295000 | 1.706423000  | −0.033218000 |
| C                                            | −1.382687000 | 1.917243000  | −0.041366000 |
| C                                            | −0.506736000 | 0.812735000  | 0.016115000  |
| N                                            | −1.012480000 | −0.441859000 | 0.070804000  |
| C                                            | −2.350384000 | −0.639851000 | 0.088871000  |
| C                                            | 0.920041000  | 1.024738000  | 0.012294000  |
| Cl                                           | 2.036928000  | −0.425138000 | 0.120671000  |
| N                                            | 1.478359000  | 2.187352000  | −0.055517000 |
| O                                            | 2.732459000  | 2.346800000  | −0.050334000 |
| H                                            | −4.315960000 | 0.198913000  | 0.058978000  |
| H                                            | −3.421437000 | 2.554803000  | −0.085835000 |
| H                                            | −0.959953000 | 2.912978000  | −0.095832000 |
| H                                            | −2.677514000 | −1.672581000 | 0.139802000  |
| Zn                                           | 0.250720000  | −1.969653000 | −0.076259000 |
| Sum of electronic and zero-point Energies=   |              |              | −2654.213183 |
| Sum of electronic and thermal Energies=      |              |              | −2654.203341 |
| Sum of electronic and thermal Enthalpies=    |              |              | −2654.202397 |
| Sum of electronic and thermal Free Energies= |              |              | −2654.249643 |

| <b>[ZnCl(pao)]<sup>+</sup></b> |              |              |              |
|--------------------------------|--------------|--------------|--------------|
| Zn                             | −1.223556000 | −0.770833000 | −0.088545000 |
| Cl                             | −3.373749000 | −0.539920000 | 0.149097000  |
| N                              | 0.782134000  | −0.656268000 | −0.081041000 |
| O                              | −0.339082000 | 3.849408000  | −0.041440000 |
| C                              | 1.484742000  | −1.800915000 | −0.077240000 |
| H                              | 0.903949000  | −2.713359000 | −0.152818000 |
| C                              | 2.868554000  | −1.833884000 | 0.021116000  |
| H                              | 3.381089000  | −2.789196000 | 0.022070000  |
| C                              | 3.559713000  | −0.632164000 | 0.123831000  |
| H                              | 4.641318000  | −0.618156000 | 0.213145000  |
| C                              | 2.847118000  | 0.561492000  | 0.109763000  |

|                                              |             |             |              |
|----------------------------------------------|-------------|-------------|--------------|
| H                                            | 3.346433000 | 1.520854000 | 0.182916000  |
| C                                            | 1.456825000 | 0.519440000 | 0.003374000  |
| C                                            | 0.713507000 | 1.730455000 | −0.020431000 |
| N                                            | 0.206084000 | 2.776508000 | −0.029612000 |
| Sum of electronic and zero-point Energies=   |             |             | −2654.259065 |
| Sum of electronic and thermal Energies=      |             |             | −2654.248416 |
| Sum of electronic and thermal Enthalpies=    |             |             | −2654.247472 |
| Sum of electronic and thermal Free Energies= |             |             | −2654.298183 |

#### [ZnCl<sub>2</sub>(pao)<sub>2</sub>]

|                                              |              |              |              |
|----------------------------------------------|--------------|--------------|--------------|
| Zn                                           | −0.273068000 | −0.486994000 | 1.091653000  |
| Cl                                           | −0.994452000 | −2.411766000 | 2.047208000  |
| Cl                                           | 0.429263000  | 1.245533000  | 2.349593000  |
| N                                            | 1.004439000  | −1.207629000 | −0.459821000 |
| N                                            | −1.944865000 | 0.169437000  | −0.093584000 |
| O                                            | 3.890666000  | 2.192131000  | 0.952167000  |
| C                                            | 0.539569000  | −2.262614000 | −1.140534000 |
| H                                            | −0.437387000 | −2.629062000 | −0.840444000 |
| C                                            | 1.250723000  | −2.880985000 | −2.162126000 |
| H                                            | 0.820558000  | −3.732672000 | −2.677710000 |
| C                                            | 2.508675000  | −2.387700000 | −2.491293000 |
| H                                            | 3.098189000  | −2.845322000 | −3.279736000 |
| C                                            | 3.008615000  | −1.296336000 | −1.791062000 |
| H                                            | 3.986060000  | −0.881062000 | −2.010183000 |
| C                                            | 2.226793000  | −0.729434000 | −0.780686000 |
| C                                            | 2.733443000  | 0.386342000  | −0.052141000 |
| N                                            | 3.320159000  | 1.268012000  | 0.425539000  |
| O                                            | 1.057886000  | 3.557253000  | −1.171450000 |
| N                                            | 0.111943000  | 2.816076000  | −1.047085000 |
| C                                            | −0.783294000 | 2.089284000  | −0.906935000 |
| C                                            | −1.962309000 | 1.288889000  | −0.852499000 |
| C                                            | −3.086738000 | 1.683675000  | −1.581020000 |
| H                                            | −3.050429000 | 2.589047000  | −2.176798000 |
| C                                            | −4.232015000 | 0.897558000  | −1.521633000 |
| H                                            | −5.118264000 | 1.182946000  | −2.080016000 |
| C                                            | −4.218995000 | −0.250495000 | −0.738386000 |
| H                                            | −5.088465000 | −0.894039000 | −0.658953000 |
| C                                            | −3.057588000 | −0.573343000 | −0.044001000 |
| H                                            | −3.001413000 | −1.459454000 | 0.581454000  |
| Sum of electronic and zero-point Energies=   |              |              | −3529.647536 |
| Sum of electronic and thermal Energies=      |              |              | −3529.625984 |
| Sum of electronic and thermal Enthalpies=    |              |              | −3529.625040 |
| Sum of electronic and thermal Free Energies= |              |              | −3529.704094 |

#### [ZnCl<sub>2</sub>(pao)<sub>2</sub>]<sup>+</sup>

|    |              |              |              |
|----|--------------|--------------|--------------|
| Zn | 1.000433000  | −0.435731000 | −1.081951000 |
| Cl | 3.043873000  | −1.383838000 | −1.294411000 |
| Cl | −0.220365000 | 0.177536000  | −2.864795000 |
| N  | −0.009210000 | −1.504137000 | 0.457360000  |
| N  | 1.217110000  | 1.179624000  | 0.297830000  |
| O  | −4.219889000 | −0.512208000 | −0.802568000 |
| C  | 0.681988000  | −2.455600000 | 1.102854000  |



|                                              |              |              |              |
|----------------------------------------------|--------------|--------------|--------------|
| H                                            | 1.682742000  | −2.645696000 | 0.725903000  |
| C                                            | 0.166409000  | −3.155445000 | 2.185230000  |
| H                                            | 0.768934000  | −3.913233000 | 2.674261000  |
| C                                            | −1.122120000 | −2.857119000 | 2.617769000  |
| H                                            | −1.561029000 | −3.379505000 | 3.462491000  |
| C                                            | −1.849377000 | −1.878342000 | 1.950303000  |
| H                                            | −2.857608000 | −1.618040000 | 2.254203000  |
| C                                            | −1.257669000 | −1.226929000 | 0.867280000  |
| C                                            | −2.031989000 | −0.234430000 | 0.121021000  |
| N                                            | −3.133555000 | −0.276866000 | −0.346599000 |
| O                                            | −3.160946000 | 2.220259000  | −0.764110000 |
| N                                            | −2.038333000 | 2.291105000  | −0.316156000 |
| C                                            | −1.134789000 | 1.624979000  | 0.140687000  |
| C                                            | 0.158967000  | 1.880566000  | 0.747858000  |
| C                                            | 0.274552000  | 2.848139000  | 1.746581000  |
| H                                            | −0.606974000 | 3.378077000  | 2.090120000  |
| C                                            | 1.534915000  | 3.116217000  | 2.271044000  |
| H                                            | 1.654454000  | 3.871686000  | 3.041636000  |
| C                                            | 2.628674000  | 2.399918000  | 1.798255000  |
| H                                            | 3.628581000  | 2.573795000  | 2.181059000  |
| C                                            | 2.422405000  | 1.434833000  | 0.817326000  |
| H                                            | 3.241060000  | 0.838769000  | 0.424489000  |
| Sum of electronic and zero-point Energies=   |              |              | −3529.611104 |
| Sum of electronic and thermal Energies=      |              |              | −3529.590803 |
| Sum of electronic and thermal Enthalpies=    |              |              | −3529.589859 |
| Sum of electronic and thermal Free Energies= |              |              | −3529.663083 |

#### Final Product (Complex 1)

|    |              |              |              |
|----|--------------|--------------|--------------|
| Zn | −0.983548000 | −0.933881000 | 0.744608000  |
| Cl | −2.547915000 | −2.531170000 | 0.445638000  |
| Cl | −0.076530000 | −0.419806000 | 2.751465000  |
| N  | 0.636180000  | −1.348988000 | −0.562220000 |
| N  | −1.574167000 | 0.777841000  | −0.332315000 |
| O  | 3.806960000  | 0.921019000  | 0.773119000  |
| C  | 0.666737000  | −2.538381000 | −1.175161000 |
| H  | −0.202699000 | −3.170903000 | −1.020592000 |
| C  | 1.741178000  | −2.954162000 | −1.952842000 |
| H  | 1.720286000  | −3.930689000 | −2.424542000 |
| C  | 2.825515000  | −2.096862000 | −2.100345000 |
| H  | 3.684361000  | −2.383883000 | −2.699331000 |
| C  | 2.796410000  | −0.854874000 | −1.473837000 |
| H  | 3.621266000  | −0.158504000 | −1.575637000 |
| C  | 1.679458000  | −0.511501000 | −0.714502000 |
| C  | 1.605858000  | 0.796746000  | −0.055385000 |
| N  | 2.671316000  | 1.313762000  | 0.555881000  |
| O  | 2.320517000  | 2.592979000  | 1.019289000  |
| N  | 1.043981000  | 2.848573000  | 0.670274000  |
| C  | 0.593301000  | 1.797962000  | 0.034247000  |
| C  | −0.770042000 | 1.838664000  | −0.525265000 |
| C  | −1.191495000 | 2.972771000  | −1.213647000 |
| H  | −0.506616000 | 3.801388000  | −1.356571000 |
| C  | −2.488766000 | 3.007648000  | −1.717804000 |

|                                              |              |              |              |
|----------------------------------------------|--------------|--------------|--------------|
| H                                            | -2.840588000 | 3.879815000  | -2.260347000 |
| C                                            | -3.316313000 | 1.908103000  | -1.523553000 |
| H                                            | -4.332070000 | 1.887344000  | -1.903585000 |
| C                                            | -2.818379000 | 0.813598000  | -0.825750000 |
| H                                            | -3.423673000 | -0.070110000 | -0.645916000 |
| Sum of electronic and zero-point Energies=   |              |              | -3529.702577 |
| Sum of electronic and thermal Energies=      |              |              | -3529.683930 |
| Sum of electronic and thermal Enthalpies=    |              |              | -3529.682986 |
| Sum of electronic and thermal Free Energies= |              |              | -3529.751228 |

## L

|                                              |              |              |              |
|----------------------------------------------|--------------|--------------|--------------|
| N                                            | -2.520408000 | -0.375556000 | -0.794753000 |
| N                                            | 1.534066000  | -0.957926000 | -0.715762000 |
| O                                            | -2.404543000 | 2.570391000  | 0.067865000  |
| C                                            | -3.276016000 | -1.473733000 | -0.742619000 |
| C                                            | -3.062772000 | -2.513894000 | 0.160625000  |
| C                                            | -2.006250000 | -2.403639000 | 1.059456000  |
| C                                            | -1.208175000 | -1.265459000 | 1.018931000  |
| C                                            | -1.505869000 | -0.283043000 | 0.072455000  |
| C                                            | -0.696866000 | 0.944690000  | 0.004415000  |
| N                                            | -1.257931000 | 2.149456000  | 0.015164000  |
| O                                            | -0.216227000 | 3.105677000  | -0.010704000 |
| N                                            | 0.968362000  | 2.456174000  | -0.039849000 |
| C                                            | 0.709529000  | 1.172800000  | -0.025845000 |
| C                                            | 1.802615000  | 0.186182000  | -0.075450000 |
| C                                            | 3.039166000  | 0.475128000  | 0.505327000  |
| C                                            | 4.049803000  | -0.475369000 | 0.404316000  |
| C                                            | 3.784489000  | -1.668377000 | -0.260951000 |
| C                                            | 2.512693000  | -1.859542000 | -0.800256000 |
| H                                            | -4.092058000 | -1.525088000 | -1.460472000 |
| H                                            | -3.712066000 | -3.384013000 | 0.155743000  |
| H                                            | -1.806887000 | -3.188067000 | 1.783993000  |
| H                                            | -0.377408000 | -1.137665000 | 1.705805000  |
| H                                            | 3.195702000  | 1.415321000  | 1.024523000  |
| H                                            | 5.025225000  | -0.288251000 | 0.844146000  |
| H                                            | 4.541510000  | -2.440179000 | -0.360374000 |
| H                                            | 2.269436000  | -2.780101000 | -1.326670000 |
| Sum of electronic and zero-point Energies=   |              |              | -830.320289  |
| Sum of electronic and thermal Energies=      |              |              | -830.306964  |
| Sum of electronic and thermal Enthalpies=    |              |              | -830.306020  |
| Sum of electronic and thermal Free Energies= |              |              | -830.362479  |

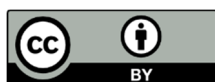

Supplement: s1 [file s1]
