# Supplementary material
Source: MDPI journal article supplement (https://www.mdpi.com/2304-6740/8/9/47)

# checkCIF/PLATON report

Structure factors have been supplied for datablock(s) COMPOUND1

THIS REPORT IS FOR GUIDANCE ONLY. IF USED AS PART OF A REVIEW PROCEDURE FOR PUBLICATION, IT SHOULD NOT REPLACE THE EXPERTISE OF AN EXPERIENCED CRYSTALLOGRAPHIC REFEREE.

No syntax errors found.      CIF dictionary      Interpreting this report

## Datablock: COMPOUND1

---

Bond precision:    C-C = 0.0115 Å                      Wavelength=1.54178

Cell:                      a=6.4893(1)              b=14.9997(3)              c=14.2753(3)  
                                alpha=90              beta=90.637(1)              gamma=90

Temperature:            160 K

|                | Calculated          | Reported            |
|----------------|---------------------|---------------------|
| Volume         | 1389.44(5)          | 1389.44(5)          |
| Space group    | P 21/n              | P 21/n              |
| Hall group     | -P 2yn              | -P 2yn              |
| Moiety formula | C12 H8 Cl2 N4 O2 Zn | ?                   |
| Sum formula    | C12 H8 Cl2 N4 O2 Zn | C12 H8 Cl2 N4 O2 Zn |
| Mr             | 376.51              | 376.49              |
| Dx,g cm-3      | 1.800               | 1.800               |
| Z              | 4                   | 4                   |
| Mu (mm-1)      | 6.090               | 6.090               |
| F000           | 752.0               | 752.0               |
| F000'          | 750.35              |                     |
| h,k,lmax       | 7,17,16             | 7,17,16             |
| Nref           | 2368                | 2338                |
| Tmin,Tmax      | 0.506,0.578         | 0.522,1.000         |
| Tmin'          | 0.120               |                     |

Correction method= # Reported T Limits: Tmin=0.522 Tmax=1.000  
AbsCorr = EMPIRICAL

Data completeness= 0.987                      Theta(max)= 64.987

R(reflections)= 0.0705( 1890)              wR2(reflections)= 0.1654( 2338)

S = 1.124                      Npar= 191

---

The following ALERTS were generated. Each ALERT has the format

**test-name\_ALERT\_alert-type\_alert-level.**

Click on the hyperlinks for more details of the test.

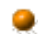

#### Alert level B

PLAT230\_ALERT\_2\_B Hirshfeld Test Diff for N3 --C7 . 8.7 s.u.

**Author Response:** As the data and model do not suffer from unresolved effects such as twinning, absorption correction errors or disorder, this difference is usually caused by wrong atom assignment. The wrong atom assignment can clearly be excluded in the present compound, the identity of which has been confirmed by detailed NMR (1H, 13C, 15N) studies and accurate elemental (C, H, N) analyses. Moreover, advanced theoretical calculations (DFT) and literature reports on published complexes with the same ligand, fully support the proposed assignments. This Alert is probably caused by the adequate use of the rigid bond assumption of the Hirshfeld test and the charge deformation due to chemical bonding, as it is considered in our case, giving this difference in the values of anisotropic displacement parameters along this chemical bond. This case is often met in structure analysis studies.

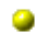

#### Alert level C

THETM01\_ALERT\_3\_C The value of  $\sin(\theta_{\max})/\lambda$  is less than 0.590  
Calculated  $\sin(\theta_{\max})/\lambda = 0.5878$   
PLAT018\_ALERT\_1\_C  $\text{\_diffn\_measured\_fraction\_}\theta_{\max}$  .NE. \*\_full ! Check  
PLAT230\_ALERT\_2\_C Hirshfeld Test Diff for O2 --N3 . 6.0 s.u.

**Author Response:** As the data and model do not suffer from unresolved effects such as twinning, absorption correction errors or disorder, this difference is usually caused by wrong atom assignment. The wrong atom assignment can clearly be excluded in the present compound, the identity of which has been confirmed by detailed NMR (1H, 13C, 15N) studies and accurate elemental (C, H, N) analyses. Moreover, advanced theoretical calculations (DFT) and literature reports on published complexes with the same ligand, fully support the proposed assignments. This Alert is probably caused by the adequate use of the rigid bond assumption of the Hirshfeld test and the charge deformation due to chemical bonding, as it is considered in our case, giving this difference in the values of anisotropic displacement parameters along this chemical bond. This case is often met in structure analysis studies.

PLAT234\_ALERT\_4\_C Large Hirshfeld Difference O1 --N4 . 0.17 Ang.  
PLAT341\_ALERT\_3\_C Low Bond Precision on C-C Bonds ..... 0.01145 Ang.  
PLAT480\_ALERT\_4\_C Long H...A H-Bond Reported H11 ..CL2 . 2.92 Ang.  
PLAT480\_ALERT\_4\_C Long H...A H-Bond Reported H12 ..CL1 . 2.99 Ang.  
PLAT906\_ALERT\_3\_C Large K Value in the Analysis of Variance ..... 3.422 Check  
PLAT911\_ALERT\_3\_C Missing FCF Refl Between Thmin & STh/L= 0.588 28 Report

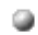

#### Alert level G

|                   |                                                  |                 |      |              |
|-------------------|--------------------------------------------------|-----------------|------|--------------|
| PLAT083_ALERT_2_G | SHELXL Second Parameter in WGHT                  | Unusually Large | 8.45 | Why ?        |
| PLAT794_ALERT_5_G | Tentative Bond Valency for Zn1                   | (II)            | 1.97 | Info         |
| PLAT870_ALERT_4_G | ALERTS Related to Twinning Effects Suppressed    | ..              |      | ! Info       |
| PLAT883_ALERT_1_G | No Info/Value for _atom_sites_solution_primary   | .               |      | Please Do !  |
| PLAT909_ALERT_3_G | Percentage of I>2sig(I) Data at Theta(Max)       | Still           | 57%  | Note         |
| PLAT910_ALERT_3_G | Missing # of FCF Reflection(s) Below Theta(Min). |                 | 3    | Note         |
| PLAT933_ALERT_2_G | Number of OMIT Records in Embedded .res File     | ...             | 2    | Note         |
| PLAT965_ALERT_2_G | The SHELXL WEIGHT Optimisation has not Converged |                 |      | Please Check |

---

0 **ALERT level A** = Most likely a serious problem - resolve or explain  
1 **ALERT level B** = A potentially serious problem, consider carefully  
9 **ALERT level C** = Check. Ensure it is not caused by an omission or oversight  
8 **ALERT level G** = General information/check it is not something unexpected

2 ALERT type 1 CIF construction/syntax error, inconsistent or missing data  
5 ALERT type 2 Indicator that the structure model may be wrong or deficient  
6 ALERT type 3 Indicator that the structure quality may be low  
4 ALERT type 4 Improvement, methodology, query or suggestion  
1 ALERT type 5 Informative message, check

---

## Validation response form

Please find below a validation response form (VRF) that can be filled in and pasted into your CIF.

```
# start Validation Reply Form
_vrf_THETM01_COMPOUND1
;
PROBLEM: The value of sine(theta_max)/wavelength is less than 0.590
RESPONSE: ...
;
_vrf_PLAT018_COMPOUND1
;
PROBLEM: _diffrn_measured_fraction_theta_max .NE. *_full           ! Check
RESPONSE: ...
;
_vrf_PLAT234_COMPOUND1
;
PROBLEM: Large Hirshfeld Difference O1      --N4      .      0.17 Ang.
RESPONSE: ...
;
_vrf_PLAT341_COMPOUND1
;
PROBLEM: Low Bond Precision on  C-C Bonds .....      0.01145 Ang.
RESPONSE: ...
;
_vrf_PLAT480_COMPOUND1
;
PROBLEM: Long H...A H-Bond Reported H11      ..CL2      .      2.92 Ang.
RESPONSE: ...
;
_vrf_PLAT906_COMPOUND1
;
PROBLEM: Large K Value in the Analysis of Variance .....      3.422 Check
RESPONSE: ...
;
_vrf_PLAT911_COMPOUND1
;
```

PROBLEM: Missing FCF Refl Between Thmin & STh/L= 0.588 28 Report  
RESPONSE: ...  
;  
# end Validation Reply Form

---

It is advisable to attempt to resolve as many as possible of the alerts in all categories. Often the minor alerts point to easily fixed oversights, errors and omissions in your CIF or refinement strategy, so attention to these fine details can be worthwhile. In order to resolve some of the more serious problems it may be necessary to carry out additional measurements or structure refinements. However, the purpose of your study may justify the reported deviations and the more serious of these should normally be commented upon in the discussion or experimental section of a paper or in the "special\_details" fields of the CIF. checkCIF was carefully designed to identify outliers and unusual parameters, but every test has its limitations and alerts that are not important in a particular case may appear. Conversely, the absence of alerts does not guarantee there are no aspects of the results needing attention. It is up to the individual to critically assess their own results and, if necessary, seek expert advice.

### **Publication of your CIF in IUCr journals**

A basic structural check has been run on your CIF. These basic checks will be run on all CIFs submitted for publication in IUCr journals (*Acta Crystallographica*, *Journal of Applied Crystallography*, *Journal of Synchrotron Radiation*); however, if you intend to submit to *Acta Crystallographica Section C* or *E* or *IUCrData*, you should make sure that full publication checks are run on the final version of your CIF prior to submission.

### **Publication of your CIF in other journals**

Please refer to the *Notes for Authors* of the relevant journal for any special instructions relating to CIF submission.

---

**PLATON version of 10/08/2020; check.def file version of 06/08/2020**

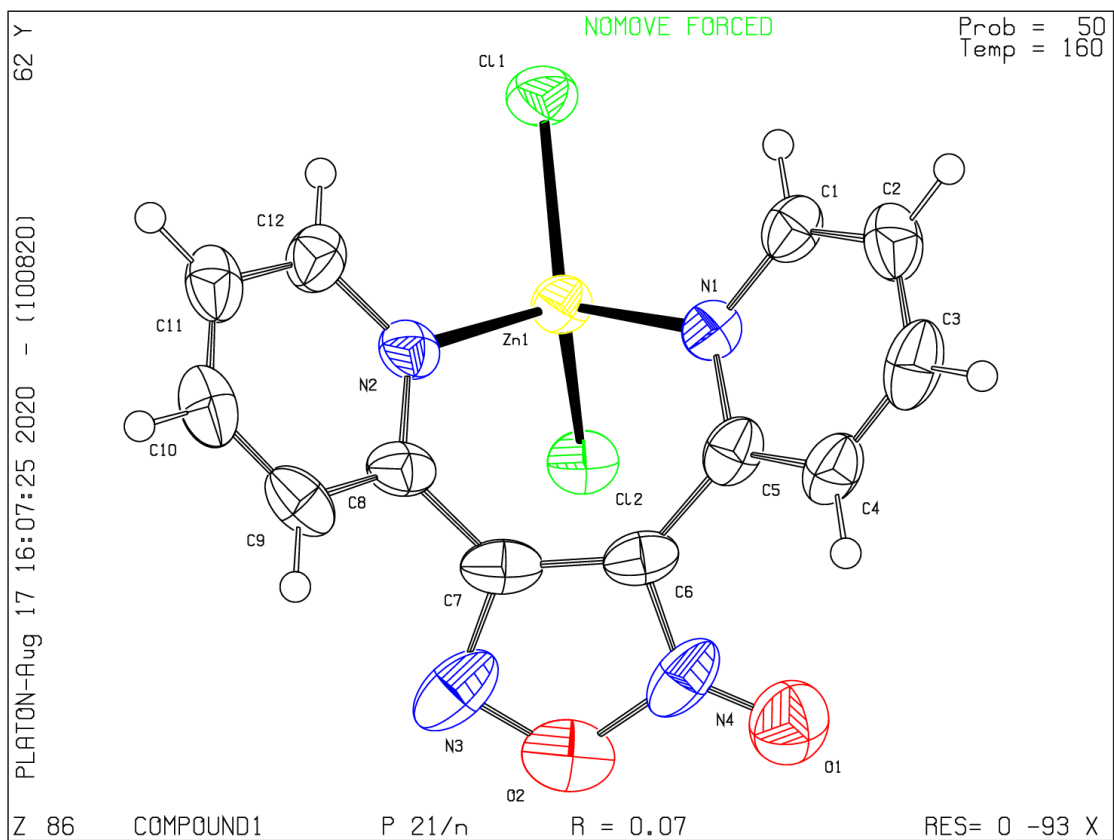

Supplement: s1 [file s1]
